# Supplementary material for: Preparation of PVA/cellulose composite hydrogel electrolytes based on zinc chloride-dissolved cellulose for flexible solid-state capacitors
Source: Royal Society of Chemistry journal article supplement (doi:10.1039/d3tc03988a), 2024-01-01
Supplement: d3tc03988a1.pdf [file d3tc03988a1.pdf]

## Support information

# Preparation of PVA/Cellulose composite hydrogel electrolytes based on Zinc chloride-dissolved cellulose for flexible solid-state capacitors

Ru Zhang<sup>a</sup>, Chengfeng Wu<sup>\* a</sup>, Xuyan Liao<sup>a</sup>, Axi Luo<sup>a</sup>, Yidan Jing<sup>\* a</sup>, Ningya Yu<sup>a</sup>, Shengpei Su<sup>a</sup>, Xiaomin Zhang<sup>\* a</sup> and Jin Zhu<sup>b</sup>

<sup>a</sup> Key Laboratory of Chemical Biology and Traditional Chinese Medicine Research (Ministry of Education of China); The Key Lab for Fine Processing of Resources and Advanced Materials of Hunan Province; National and Local Joint Engineering Lab for New Petrochemical Materials and Fine Utilization of Resources, Hunan Normal University, Changsha 410081, People's Republic of China.

<sup>b</sup> Key Laboratory of Bio-based Polymeric Materials, Ningbo Institute of Material Technology and Engineering, Chinese Academy of Sciences, Ningbo 315201, People's Republic of China.

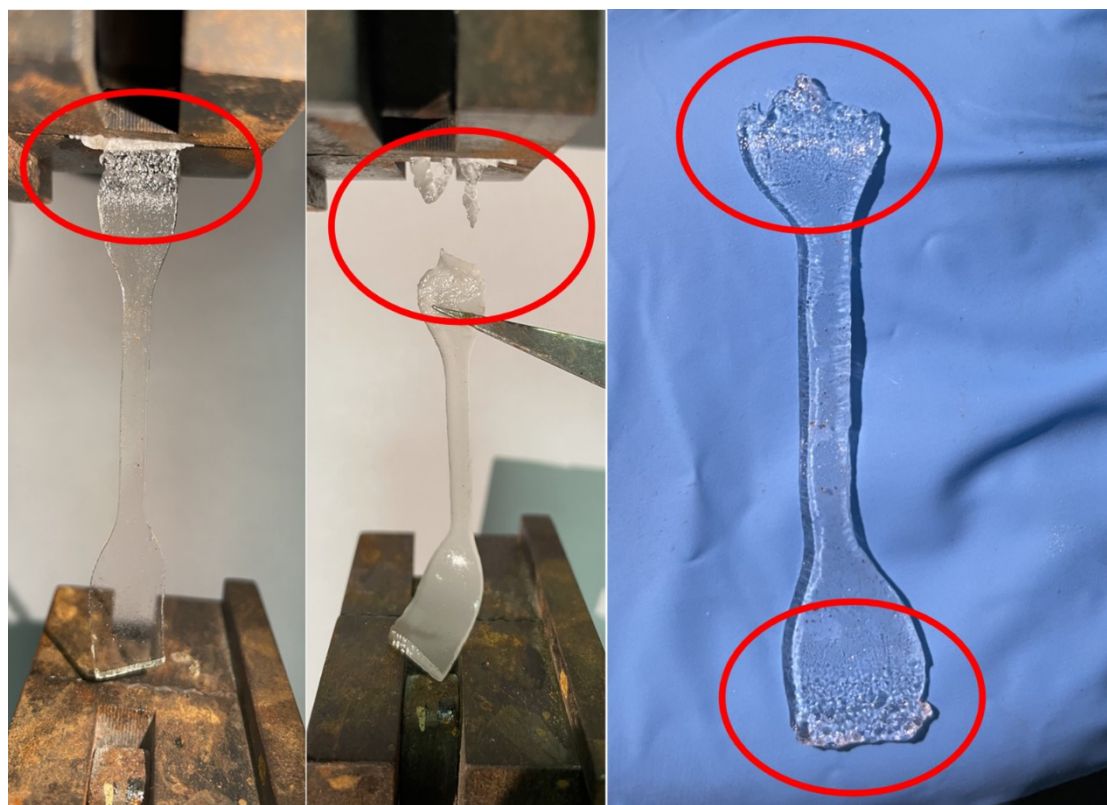

**Figure S1** Photos of pure cellulose hydrogel being clamped by a fixture.

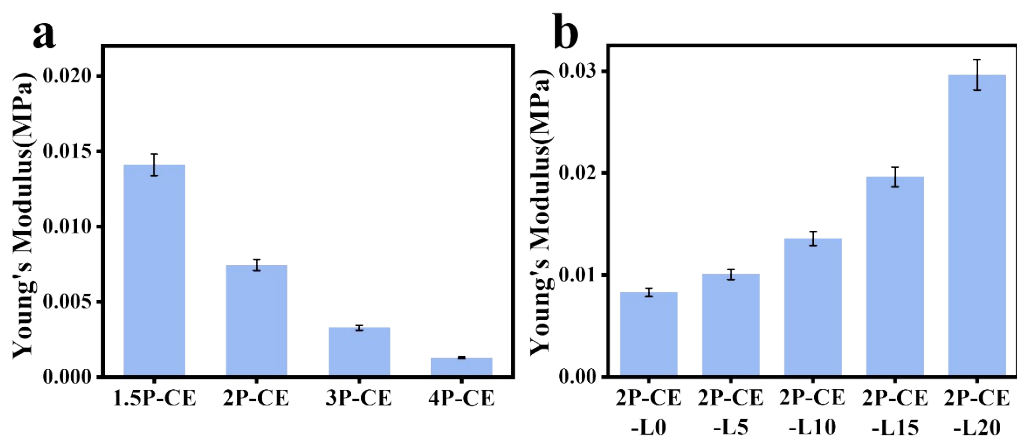

**Figure S2** a: Young's modulus of PVA/cellulose composite hydrogels; b: young's modulus of PVA/cellulose/LiCl composite hydrogels.

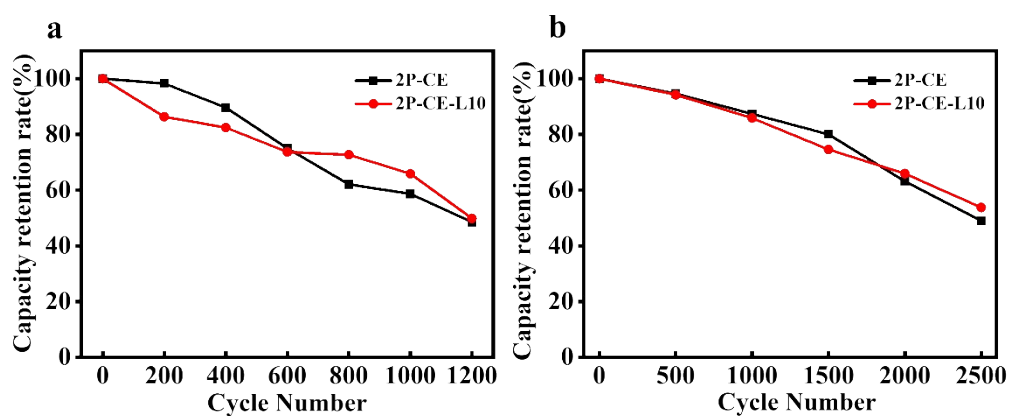

**Figure S3** a: Capacitance retention rate in cycling of the carbon symmetric capacitors assembled with different hydrogel electrolytes; b: Capacitance retention rate in cycling of the zinc/carbon asymmetric capacitors assembled with different hydrogel electrolytes.

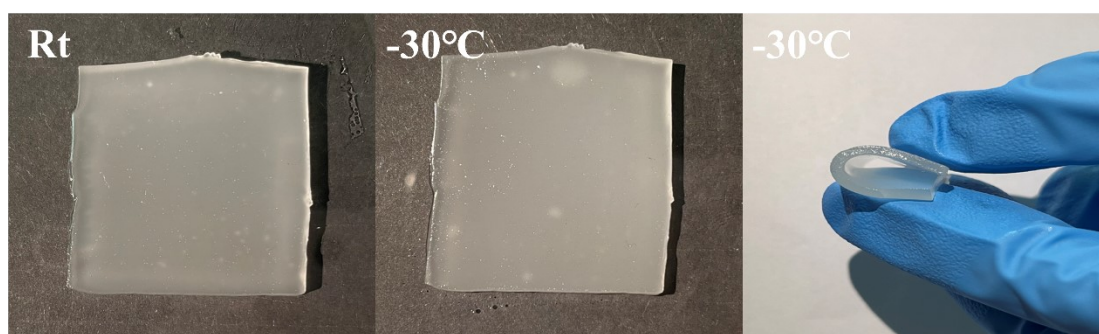

**Figure S4** Hydrogel frost resistance and flexibility at low temperature display.

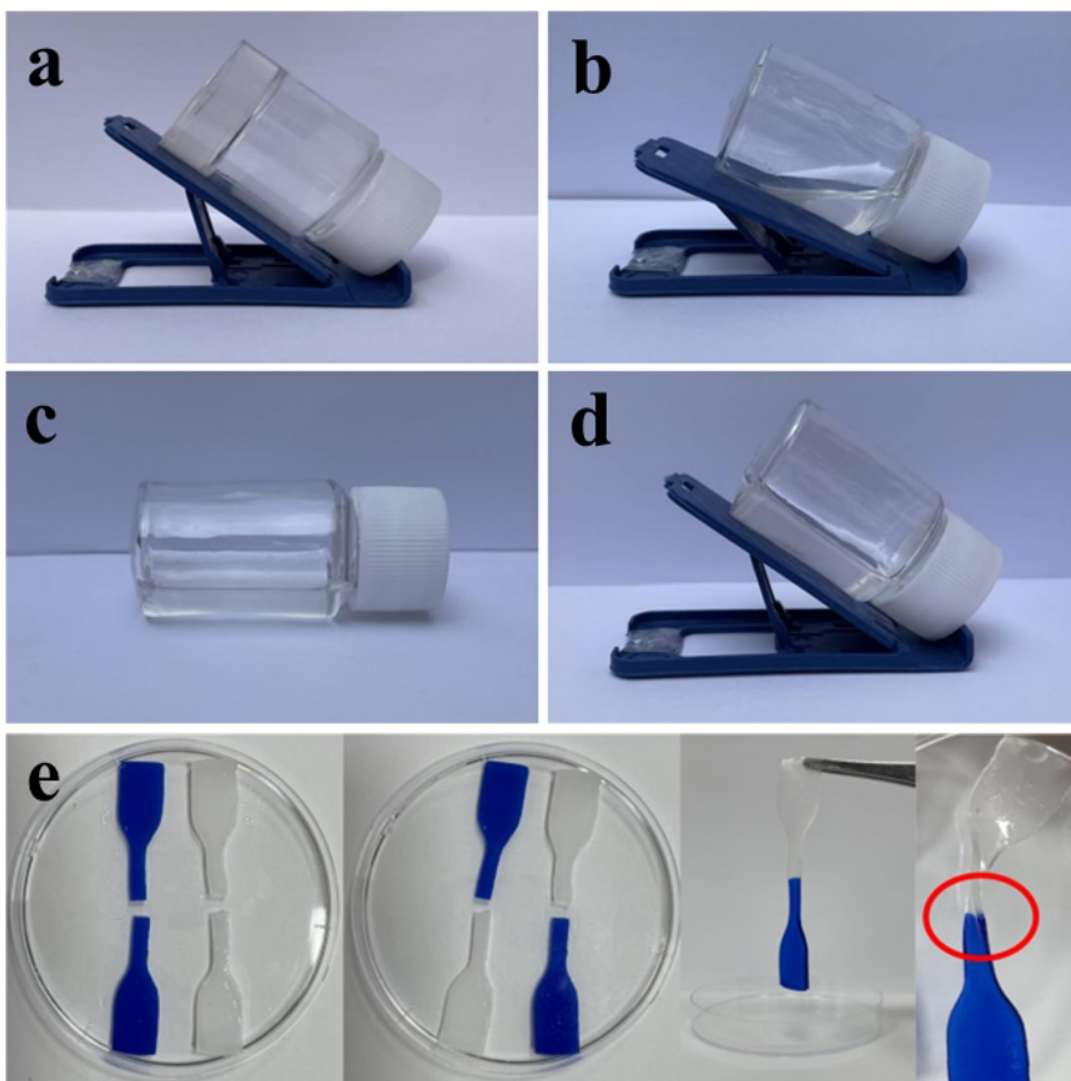

**Figure S5** a-d: Hydrogel electrolyte thermoplastic display; e Hydrogel electrolyte self-healing display.

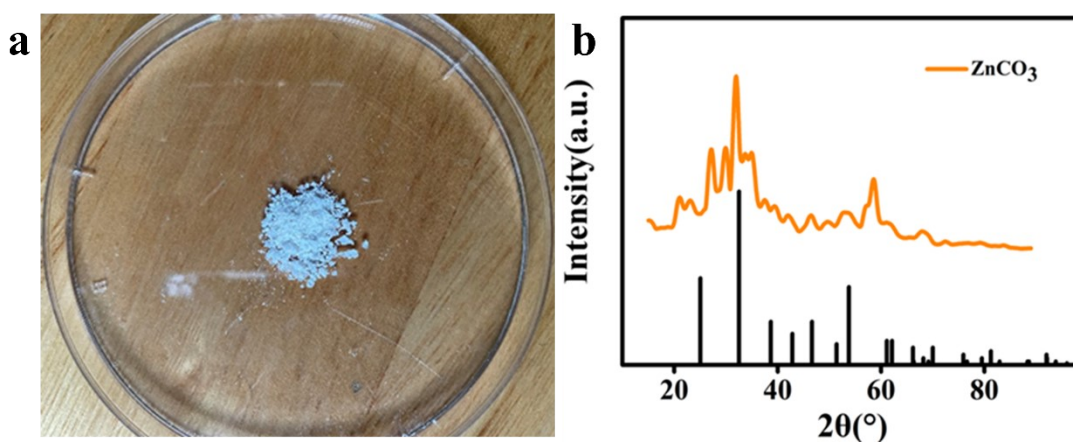

**Figure S6** a: Recycled zinc carbonate picture; b: XRD pattern of zinc carbonate.

**Table S1** : Formulation of PVA/cellulose hydrogel

| Sample            | ZCE | 1P-CE | 1.5P-CE | 2P-CE | 3P-CE | 4P-CE |
|-------------------|-----|-------|---------|-------|-------|-------|
| PVA:Cellulos<br>e | 0:1 | 1:1   | 1.5:1   | 2:1   | 3:1   | 4:1   |

**Table S2** : Electrolyte composition in hydrogel electrolytes

| Sample                  | 2P-CE-L0                   | 2P-CE-L5                             | 2P-CE-L10                             | 2P-CE-L15                             | 2P-CE-L20                             |
|-------------------------|----------------------------|--------------------------------------|---------------------------------------|---------------------------------------|---------------------------------------|
| Electrolyte<br>solution | 20wt%<br>CaCl <sub>2</sub> | 20wt% CaCl <sub>2</sub><br>5wt% LiCl | 20wt% CaCl <sub>2</sub><br>10wt% LiCl | 20wt% CaCl <sub>2</sub><br>15wt% LiCl | 20wt% CaCl <sub>2</sub><br>20wt% LiCl |
